# Supplementary material for: Randomizing Genome-Scale Metabolic Networks
Source: PLoS One. 2011 Jul 14;6(7):e22295. doi: 10.1371/journal.pone.0022295 (PMC3136524; doi:10.1371/journal.pone.0022295)
Supplement: Table S1 — List of currency metabolites used to construct the unipartite graph. This list was built mostly from information in the paper by Ma and Zeng (Bioinformatics, 19, 270 (2003)). The metabolites shaded in grey were absent in the modified currency list used to generate Figure S6. (XLS) [file pone.0022295.s007.xls]

## Sheet: Sheet1
Table S1: List of currency metabolites used to construct the unipartite graph. This list was built mostly from information in the paper by Ma and Zeng (Bioinformatics, 19, 270 (2003)). The metabolites shaded in grey were absent in the modified currency list used to generate Figure S6.
Metabolite(s)	Context in which metabolite is regarded as currency
H2O	Always
H2O[e]	Always
H+	Always
H+[e]	Always
O2	Always
O2[e]	Always
H2O2	Always
CO2	Always
CO2[e]	Always
H2CO3	Always
NH3	Always
Nitrite	Always
Nitrite[e]	Always
Nitrate	Always
Nitrate[e]	Always
Nitric oxide	Always
H2S	Always
Sulfate	Always
Sulfite	Always
Sodium	Always
Sodium[e]	Always
Potassium	Always
Potassium[e]	Always
Fe2+	Always
Fe2+[e]	Always
Fe3+	Always
Orthophosphate	Always
Pyrophosphate	Always
CoA	Always except reactions in CoA synthesis pathway
Acetate	Always
ATP/ADP	Phosphate transfer
ATP/AMP	Phosphate transfer
ADP/AMP	Phosphate transfer
GTP/GDP	Phosphate transfer
GTP/GMP	Phosphate transfer
GDP/GMP	Phosphate transfer
CTP/CDP	Phosphate transfer
CTP/CMP	Phosphate transfer
CDP/CMP	Phosphate transfer
UTP/UDP	Phosphate transfer
UTP/UMP	Phosphate transfer
UDP/UMP	Phosphate transfer
ITP/IDP	Phosphate transfer
ITP/IMP	Phosphate transfer
IDP/IMP	Phosphate transfer
NADH/NAD+	Hydrogen transfer
NADPH/NADP+	Hydrogen transfer
FADH/FAD+	Hydrogen transfer
Reduced Acceptor/Acceptor	Hydrogen transfer
Glutathione/Oxidized Glutathione	Hydrogen transfer
Ferrocytochrome c/Ferricytochrome c	Hydrogen transfer
Reduced ferredoxin/Oxidized ferredoxin	Hydrogen transfer
Reduced rubredoxin/Oxidized rubredoxin	Hydrogen transfer
Reduced adrenal ferredoxin/Oxidized adrenal ferredoxin	Hydrogen transfer
Dihydrobiopterin/Tetrahydrobiopterin	Hydrogen transfer
Ubiquinol-8/Ubiquinone-8	Hydrogen transfer
5,10-Methylenetetrahydrofolate/Tetrahydrofolate	One carbon unit transfer
10-Formyltetrahydrofolate/Tetrahydrofolate	One carbon unit transfer
5-Methyltetrahydrofolate/Tetrahydrofolate	One carbon unit transfer
5,10-Methenyltetrahydrofolate/Tetrahydrofolate	One carbon unit transfer
5-Formiminotetrahydrofolate/Tetrahydrofolate	One carbon unit transfer
10-Formyldihydrofolate/Tetrahydrofolate	One carbon unit transfer
5-Formyltetrahydrofolate/Tetrahydrofolate	One carbon unit transfer
S-Adenosyl-L-methionine/S-Adenosyl-L-homocysteine Adenosine	Methyl group transfer
3',5'-bisphosphate/3'-Phosphoadenylyl sulfate	Sulfate group transfer
UDP-glucose/UDP	Monosaccharide unit transfer
UDP-N-acetyl-D-glucosamine/UDP	Monosaccharide unit transfer
UDP-D-galactose/UDP	Monosaccharide unit transfer
UDP-glucuronate/UDP	Monosaccharide unit transfer
UDP-D-xylose/UDP	Monosaccharide unit transfer
UDP-N-acetyl-D-galactosamine/UDP	Monosaccharide unit transfer
Glutamate/Oxoglutarate	Amino group transfer
Glutamine/Glutamate	Amino group transfer
Pyruvate/Alanine	Amino group transfer
Pyruvate/Phosphoenolpyruvate	Phosphate transfer
Acetyl-CoA/CoA	Acetyl group transfer
